# Supplementary material for: Association of Neighborhood-Level Household Income With 21-Gene Recurrence Score and Survival Among Patients With Estrogen Receptor–Positive Breast Cancer
Source: PubMed Central journal article supplement (PMC9945075; doi:10.1001/jamanetworkopen.2023.0179), 2023-02-21
Supplement: jamanetwopen-e230179-s001.pdf [file jamanetwopen-e230179-s001.pdf]

## Supplemental Online Content

Ma SJ, Gill J, Waldman O, et al. Association of neighborhood-level household income with 21-gene recurrence score and survival among patients with estrogen receptor–positive breast cancer. *JAMA Netw Open*. 2023;6(2):e230179.  
doi:10.1001/jamanetworkopen.2023.0179

**eTable 1.** Baseline Patient, Tumor, and Treatment Characteristics Between Those With Unknown Versus Known 21-gene Recurrence Score and/or Income Levels

**eTable 2.** Baseline Patient, Tumor, and Treatment Characteristics After Matching

This supplemental material has been provided by the authors to give readers additional information about their work.

**eTable 1.** Baseline patient, tumor, and treatment characteristics between those with unknown versus known 21-gene recurrence score and/or income levels

|                        | Known RS and income |      | Unknown RS or income |      |
|------------------------|---------------------|------|----------------------|------|
|                        | N                   | %    | N                    | %    |
| Age                    |                     |      |                      |      |
| <50 years              | 23255               | 19.5 | 6703                 | 18.6 |
| 50 years or older      | 96223               | 80.5 | 29381                | 81.4 |
| Facility               |                     |      |                      |      |
| Nonacademic            | 78414               | 65.6 | 25200                | 69.8 |
| Academic               | 37882               | 31.7 | 9978                 | 27.7 |
| Not available          | 3182                | 2.7  | 906                  | 2.5  |
| Race                   |                     |      |                      |      |
| Non-Hispanic White     | 98270               | 82.2 | 29868                | 82.8 |
| Hispanic               | 7245                | 6.1  | 2042                 | 5.7  |
| Black                  | 9226                | 7.7  | 2933                 | 8.1  |
| Asian/Pacific Islander | 4737                | 4.0  | 1241                 | 3.4  |
| Insurance              |                     |      |                      |      |
| None                   | 1360                | 1.1  | 460                  | 1.3  |
| Private                | 71281               | 59.7 | 21403                | 59.3 |
| Government             | 45637               | 38.2 | 13811                | 38.3 |
| Not available          | 1200                | 1.0  | 410                  | 1.1  |
| Education              |                     |      |                      |      |
| Above median           | 76195               | 63.8 | 7793                 | 21.6 |
| Below median           | 43283               | 36.2 | 5724                 | 15.9 |
| Not available          | 0                   | 0.0  | 22567                | 62.5 |
| CDS                    |                     |      |                      |      |
| 0                      | 101331              | 84.8 | 30155                | 83.6 |
| 1                      | 14610               | 12.2 | 4741                 | 13.1 |
| 2+                     | 3537                | 3.0  | 1188                 | 3.3  |
| Year                   |                     |      |                      |      |
| 2006-2013              | 48068               | 40.2 | 15860                | 44.0 |
| 2014-2017              | 70706               | 59.2 | 20034                | 55.5 |

|                             |        |      |       |      |
|-----------------------------|--------|------|-------|------|
|                             |        |      |       |      |
| Histology                   |        |      |       |      |
| Ductal or lobular carcinoma | 102769 | 86.0 | 30875 | 85.6 |
| Other                       | 16709  | 14.0 | 5209  | 14.4 |
|                             |        |      |       |      |
| PR                          |        |      |       |      |
| Positive                    | 108168 | 90.5 | 33163 | 91.9 |
| Negative                    | 11310  | 9.5  | 2921  | 8.1  |
|                             |        |      |       |      |
| T staging                   |        |      |       |      |
| 1                           | 89114  | 74.6 | 27088 | 75.1 |
| 2                           | 28669  | 24.0 | 8507  | 23.6 |
| 3                           | 1695   | 1.4  | 489   | 1.4  |
|                             |        |      |       |      |
| N staging                   |        |      |       |      |
| 0                           | 101467 | 84.9 | 31377 | 87.0 |
| 1a                          | 18011  | 15.1 | 4707  | 13.0 |
|                             |        |      |       |      |
| Grade                       |        |      |       |      |
| 1                           | 33284  | 27.9 | 10471 | 29.0 |
| 2                           | 63708  | 53.3 | 19286 | 53.4 |
| 3                           | 18112  | 15.2 | 4882  | 13.5 |
| Other                       | 70     | 0.1  | 19    | 0.1  |
| Not available               | 4304   | 3.6  | 1426  | 4.0  |
|                             |        |      |       |      |
| LVSI                        |        |      |       |      |
| No                          | 91324  | 76.4 | 28385 | 78.7 |
| Yes                         | 14644  | 12.3 | 3840  | 10.6 |
| Not available               | 13510  | 11.3 | 3859  | 10.7 |
|                             |        |      |       |      |
| Chemotherapy                |        |      |       |      |
| No                          | 94261  | 78.9 | 29797 | 82.6 |
| Yes                         | 25217  | 21.1 | 6287  | 17.4 |
|                             |        |      |       |      |
| Radiation                   |        |      |       |      |
| No                          | 37178  | 31.1 | 10842 | 30.0 |
| Yes                         | 80970  | 67.8 | 24826 | 68.8 |
| Not available               | 1307   | 1.1  | 393   | 1.1  |

|               |        |      |       |      |
|---------------|--------|------|-------|------|
|               |        |      |       |      |
| Surgery       |        |      |       |      |
| Lumpectomy    | 80787  | 67.6 | 24782 | 68.7 |
| Mastectomy    | 38661  | 32.4 | 11295 | 31.3 |
| Other         | 31     | 0.0  | 7     | 0.0  |
|               |        |      |       |      |
| Margin        |        |      |       |      |
| Negative      | 115414 | 96.6 | 34913 | 96.8 |
| Positive      | 3631   | 3.0  | 1037  | 2.9  |
| Not available | 433    | 0.4  | 134   | 0.4  |

N: number, CDS: Charlson-Deyo comorbidity score; PR: progesterone receptor; RS: 21-gene recurrence score; LVSI: lymphovascular space invasion

**eTable 2.** Baseline patient, tumor, and treatment characteristics after matching

|                        | RS < 26     |      |            |      | SMD   | RS 26 or higher |      |            |      |       |
|------------------------|-------------|------|------------|------|-------|-----------------|------|------------|------|-------|
|                        | High income |      | Low income |      |       | High income     |      | Low income |      | SMD   |
|                        | N           | %    | N          | %    |       | N               | %    | N          | %    |       |
| Age                    |             |      |            |      | 0.002 |                 |      |            |      | 0.014 |
| <50 years              | 3789        | 18.1 | 3775       | 18.1 |       | 655             | 17.3 | 675        | 17.8 |       |
| 50 years or older      | 17109       | 81.9 | 17123      | 81.9 |       | 3127            | 82.7 | 3107       | 82.2 |       |
| Facility               |             |      |            |      | 0.007 |                 |      |            |      | 0.004 |
| Nonacademic            | 14319       | 68.5 | 14252      | 68.2 |       | 2534            | 67.0 | 2523       | 66.7 |       |
| Academic               | 6079        | 29.1 | 6168       | 29.5 |       | 1106            | 29.2 | 1114       | 29.5 |       |
| Not available          | 500         | 2.4  | 478        | 2.3  |       | 142             | 3.8  | 145        | 3.8  |       |
| Race                   |             |      |            |      | 0.02  |                 |      |            |      | 0.005 |
| Non-Hispanic White     | 17044       | 81.6 | 16886      | 80.8 |       | 2901            | 76.7 | 2910       | 76.9 |       |
| Hispanic               | 1593        | 7.6  | 1572       | 7.5  |       | 299             | 7.9  | 288        | 7.6  |       |
| Black                  | 1583        | 7.6  | 1812       | 8.7  |       | 447             | 11.8 | 458        | 12.1 |       |
| Asian/Pacific Islander | 678         | 3.2  | 628        | 3.0  |       | 135             | 3.6  | 126        | 3.3  |       |
| Insurance              |             |      |            |      | 0.02  |                 |      |            |      | 0.041 |
| None                   | 263         | 1.3  | 295        | 1.4  |       | 50              | 1.3  | 58         | 1.5  |       |
| Private                | 11937       | 57.1 | 11625      | 55.6 |       | 2188            | 57.9 | 2088       | 55.2 |       |
| Government             | 8508        | 40.7 | 8770       | 42.0 |       | 1496            | 39.6 | 1588       | 42.0 |       |
| Not available          | 190         | 0.9  | 208        | 1.0  |       | 48              | 1.3  | 48         | 1.3  |       |
| Education              |             |      |            |      | 0.001 |                 |      |            |      | 0.004 |
| Above median           | 8051        | 38.5 | 8037       | 38.5 |       | 1467            | 38.8 | 1460       | 38.6 |       |
| Below median           | 12847       | 61.5 | 12861      | 61.5 |       | 2315            | 61.2 | 2322       | 61.4 |       |
| CDS                    |             |      |            |      | 0.01  |                 |      |            |      | 0.036 |
| 0                      | 17453       | 83.5 | 17381      | 83.2 |       | 3187            | 84.3 | 3128       | 82.7 |       |
| 1                      | 2781        | 13.3 | 2822       | 13.5 |       | 471             | 12.5 | 524        | 13.9 |       |
| 2+                     | 664         | 3.2  | 695        | 3.3  |       | 124             | 3.3  | 130        | 3.4  |       |
| Year                   |             |      |            |      | 0.009 |                 |      |            |      | 0.02  |
| 2006-2013              | 8378        | 40.1 | 8393       | 40.2 |       | 1552            | 41.0 | 1571       | 41.5 |       |
| 2014-2018              | 12417       | 59.4 | 12388      | 59.3 |       | 2193            | 58.0 | 2181       | 57.7 |       |

|                             |       |      |       |      |       |      |       |      |       |        |
|-----------------------------|-------|------|-------|------|-------|------|-------|------|-------|--------|
| Not available               | 103   | 0.5  | 117   | 0.6  |       | 37   | 1.0   | 30   | 0.8   |        |
|                             |       |      |       |      |       |      |       |      |       |        |
| Histology                   |       |      |       |      | 0.015 |      |       |      |       | 0.014  |
| Ductal or lobular carcinoma | 17989 | 86.1 | 17882 | 85.6 |       | 3432 | 90.7  | 3417 | 90.3  |        |
| Other                       | 2909  | 13.9 | 3016  | 14.4 |       | 350  | 9.3   | 365  | 9.7   |        |
|                             |       |      |       |      |       |      |       |      |       |        |
| PR                          |       |      |       |      | 0.005 |      |       |      |       | 0.015  |
| Positive                    | 19679 | 94.2 | 19654 | 94.0 |       | 2681 | 70.9  | 2656 | 70.2  |        |
| Negative                    | 1219  | 5.8  | 1244  | 6.0  |       | 1101 | 29.1  | 1126 | 29.8  |        |
|                             |       |      |       |      |       |      |       |      |       |        |
| T staging                   |       |      |       |      | 0.008 |      |       |      |       | 0.001  |
| 1                           | 15787 | 75.5 | 15733 | 75.3 |       | 2427 | 64.2  | 2436 | 64.4  |        |
| 2                           | 4812  | 23.0 | 4843  | 23.2 |       | 1310 | 34.6  | 1294 | 34.2  |        |
| 3                           | 299   | 1.4  | 322   | 1.5  |       | 45   | 1.2   | 52   | 1.4   |        |
|                             |       |      |       |      |       |      |       |      |       |        |
| N staging                   |       |      |       |      | 0.009 |      |       |      |       | 0.023  |
| 0                           | 17688 | 84.6 | 17618 | 84.3 |       | 3309 | 87.5  | 3280 | 86.7  |        |
| 1a                          | 3210  | 15.4 | 3280  | 15.7 |       | 473  | 12.5  | 502  | 13.3  |        |
|                             |       |      |       |      |       |      |       |      |       |        |
| Grade                       |       |      |       |      | 0.008 |      |       |      |       | 0.015  |
| 1                           | 6431  | 30.8 | 6534  | 31.3 |       | 316  | 8.4   | 307  | 8.1   |        |
| 2                           | 11707 | 56.0 | 11533 | 55.2 |       | 1570 | 41.5  | 1572 | 41.6  |        |
| 3                           | 2050  | 9.8  | 2078  | 9.9  |       | 1780 | 47.1  | 1777 | 47.0  |        |
| Other                       | 11    | 0.1  | 10    | 0.0  |       | 7    | 0.2   | 8    | 0.2   |        |
| Not available               | 699   | 3.3  | 743   | 3.6  |       | 109  | 2.9   | 118  | 3.1   |        |
|                             |       |      |       |      |       |      |       |      |       |        |
| RS                          |       |      |       |      | 0.01  |      |       |      |       | <0.001 |
| 0-15                        | 11970 | 57.3 | 12073 | 57.8 |       | 0    | 0.0   | 0    | 0.0   |        |
| 16-25                       | 8928  | 42.7 | 8825  | 42.2 |       | 0    | 0.0   | 0    | 0.0   |        |
| >25                         | 0     | 0.0  | 0     | 0.0  |       | 3782 | 100.0 | 3782 | 100.0 |        |
|                             |       |      |       |      |       |      |       |      |       |        |
| LVSI                        |       |      |       |      | 0.002 |      |       |      |       | 0.013  |
| No                          | 16091 | 77.0 | 16012 | 76.6 |       | 2667 | 70.5  | 2654 | 70.2  |        |
| Yes                         | 2258  | 10.8 | 2322  | 11.1 |       | 609  | 16.1  | 639  | 16.9  |        |
| Not available               | 2549  | 12.2 | 2564  | 12.3 |       | 506  | 13.4  | 489  | 12.9  |        |
|                             |       |      |       |      |       |      |       |      |       |        |
| Chemotherapy                |       |      |       |      | 0.008 |      |       |      |       | 0.004  |
| No                          | 18492 | 88.5 | 18441 | 88.2 |       | 1003 | 26.5  | 1009 | 26.7  |        |
| Yes                         | 2406  | 11.5 | 2457  | 11.8 |       | 2779 | 73.5  | 2773 | 73.3  |        |

|               |       |      |       |      |       |      |      |      |      |       |
|---------------|-------|------|-------|------|-------|------|------|------|------|-------|
|               |       |      |       |      |       |      |      |      |      |       |
| Radiation     |       |      |       |      | 0.004 |      |      |      |      | 0.003 |
| No            | 6424  | 30.7 | 6586  | 31.5 |       | 1161 | 30.7 | 1212 | 32.0 |       |
| Yes           | 14248 | 68.2 | 14092 | 67.4 |       | 2572 | 68.0 | 2519 | 66.6 |       |
| Not available | 226   | 1.1  | 220   | 1.1  |       | 49   | 1.3  | 51   | 1.3  |       |
|               |       |      |       |      |       |      |      |      |      |       |
| Surgery       |       |      |       |      | 0.018 |      |      |      |      | 0.024 |
| Lumpectomy    | 14264 | 68.3 | 14087 | 67.4 |       | 2571 | 68.0 | 2530 | 66.9 |       |
| Mastectomy    | 6630  | 31.7 | 6807  | 32.6 |       | 1210 | 32.0 | 1250 | 33.1 |       |
| Other         | 4     | 0.0  | 4     | 0.0  |       | 1    | 0.0  | 2    | 0.1  |       |
|               |       |      |       |      |       |      |      |      |      |       |
| Margin        |       |      |       |      | 0.005 |      |      |      |      | 0.013 |
| Negative      | 20230 | 96.8 | 20200 | 96.7 |       | 3662 | 96.8 | 3649 | 96.5 |       |
| Positive      | 601   | 2.9  | 625   | 3.0  |       | 107  | 2.8  | 117  | 3.1  |       |
| Not available | 67    | 0.3  | 73    | 0.3  |       | 13   | 0.3  | 16   | 0.4  |       |

N: number, SMD: standard mean difference; CDS: Charlson-Deyo comorbidity score; PR: progesterone receptor; RS: 21-gene recurrence score; LVSI: lymphovascular space invasion
