# Supplementary material for: Association of Neighborhood-Level Household Income With 21-Gene Recurrence Score and Survival Among Patients With Estrogen Receptor–Positive Breast Cancer
Source: PubMed Central journal article supplement (PMC9945075; doi:10.1001/jamanetworkopen.2023.0179), 2023-02-21
Supplement: jamanetwopen-e230179-s002.pdf [file jamanetwopen-e230179-s002.pdf]

## Data Sharing Statement

Ma. Association of Neighborhood-Level Household Income With 21-Gene Recurrence Score and Survival Among Patients With Estrogen Receptor-Positive Breast Cancer. *JAMA Netw Open*. Published February 21, 2023. doi:10.1001/jamanetworkopen.2023.0179

### Data

**Data available:** No

### Additional Information

**Explanation for why data not available:** Database is publicly available through the American College of Surgeons.
